# Supplementary material
Source: Springer Nature journal article supplement (https://www.springermedizin.de/resource/supplementary/12974_2010_285_MOESM2_ESM.pdf/9601166)

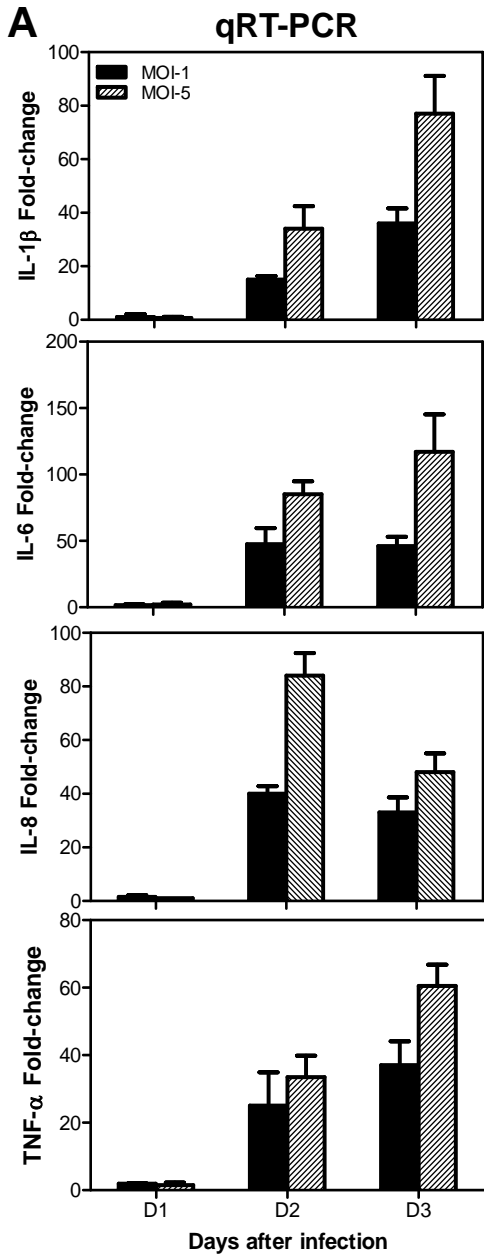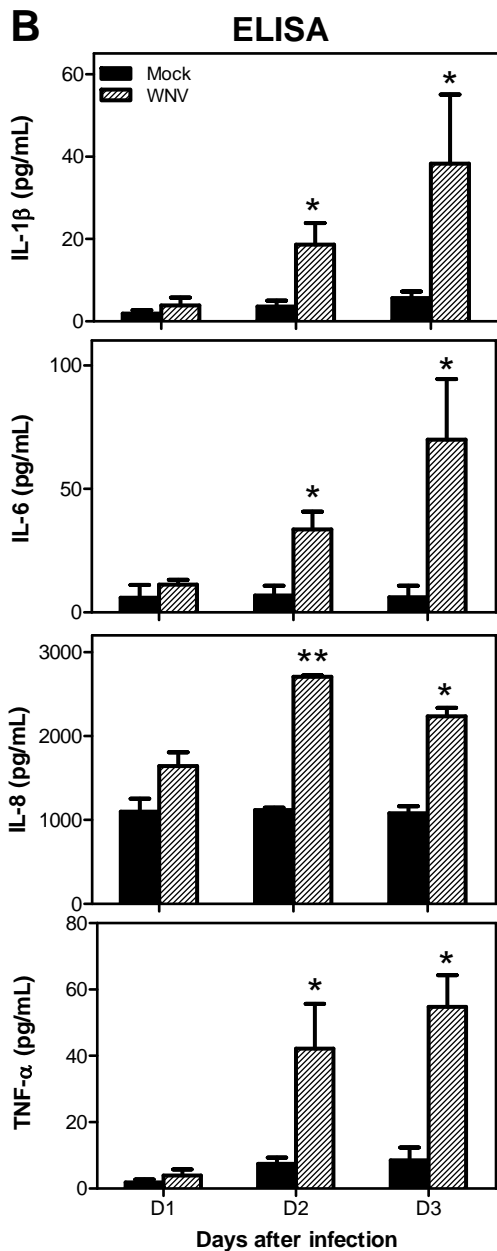

Supplement: MOESM2 [file 9601166]
